# Supplementary material
Source: Springer Nature journal article supplement (https://www.springermedizin.de/resource/supplementary/12984_2012_534_MOESM1_ESM.pdf/9604574)
Supplement: MOESM1 [file 9604574]

49 patients suspected of  
idiopathic normal pressure hydrocephalus (iNPH)

27 patients met  
criteria for iNPH

22 patients met criteria  
for an alternative neurological  
condition (iNPH-like conditions):

- 5 Vascular dementia
- 4 Parkinson's disease
- 2 Primary progressive freezing gait
- 2 Frontotemporal dementia
- 2 Depression
- 1 Dementia with Lewy bodies
- 1 Alzheimer's disease
- 1 Alcoholic dementia
- 1 HIV dementia
- 1 Progressive supranuclear palsy
- 1 Multiple systemic atrophy
- 1 Neurosyphilis
